# Supplementary material
Source: publisher site journal article supplement (https://www.dovepress.com/article/459188)
Supplement: Supplementary file 1 [file get_supplementary_file.php]

**Appendix**

*for*

**Alcohol consumption patterns for excessive drinkers in a multi-ethnic society**

Table S1 Other reasons of drinking in among different ethnic groups.

|  | Han | | | | The minority | | | |
| --- | --- | --- | --- | --- | --- | --- | --- | --- |
|  | No. | Feeling stressed a | Being required b | Only drink c | No. | Feeling stressed a | Being required b | Only drink c |
| Overall | 158 | 32(20.3) | 17(10.8) | 2(1.3) | 281 | 61(21.7) | 34(12.1) | 6(2.1) |
| **Birth Year** |  |  |  |  |  |  |  |  |
| <1969 | 38 | 12 (31.58) | 5 (13.16) | 1 (2.63) | 42 | 12 (28.57) | 8 (19.05) | 2 (4.76) |
| 1970~1979 | 42 | 8 (19.05) | 4 (9.52) | 0 (0.00) | 63 | 14 (22.22) | 7 (11.11) | 1 (1.59) |
| 1980~1989 | 32 | 4 (12.50) | 2 (6.25) | 0 (0.00) | 67 | 12 (17.91) | 4 (5.97) | 2 (2.99) |
| 1990~1999 | 39 | 7 (17.95) | 5 (12.82) | 1 (2.56) | 91 | 19 (20.88) | 11 (12.09) | 1 (1.10) |
| 2000~ | 7 | 1 (14.29) | 1 (14.29) | 0 (0.00) | 18 | 4 (22.22) | 4 (22.22) | 0 (0.00) |
| **Highest Education** |  |  |  |  |  |  |  |  |
| No formal education/ Primary school | 47 | 12 (25.53) | 3 (6.38) | 0 (0.00) | 155 | 31 (20.00) | 16 (10.32) | 4 (2.58) |
| Middle/high school | 70 | 13 (18.57) | 8 (11.43) | 1 (1.43) | 54 | 14 (25.93) | 9 (16.67) | 2 (3.70) |
| Technical school/college or above | 41 | 7 (17.07) | 6 (14.63) | 1 (2.44) | 72 | 16 (22.22) | 9 (12.50) | 0 (0.00) |
| **Household income, yuan/month** |  |  |  |  |  |  |  |  |
| <=3000 | 26 | 4 (15.38) | 4 (15.38) | 0 (0.00) | 146 | 29 (19.86) | 18 (12.33) | 3 (2.05) |
| 3001～7000 | 88 | 19 (21.59) | 8 (9.09) | 1 (1.14) | 11 | 24 (21.62) | 13 (11.71) | 3 (2.70) |
| >7000 | 44 | 9 (20.45) | 5 (11.36) | 1 (2.27) | 24 | 8 (33.33) | 3 (12.50) | 0 (0.00) |
| **Area** |  |  |  |  |  |  |  |  |
| Rural | 61 | 14 (22.95) | 8 (13.11) | 1 (1.64) | 189 | 31 (16.40) | 22 (11.64) | 6 (3.17) |
| Urban | 97 | 18 (18.56) | 9 (9.28) | 1 (1.03) | 92 | 30 (32.61) | 12 (13.04) | 0 (0.00) |
| **Job** |  |  |  |  |  |  |  |  |
| Physical work | 120 | 27 (22.50) | 15 (12.50) | 2 (1.67) | 154 | 35 (22.73) | 16 (10.39) | 2 (1.30) |
| Office work | 28 | 4 (14.29) | 2 (7.14) | 0 (0.00) | 87 | 19 (21.84) | 11 (12.64) | 2 (2.30) |
| Other/Unemployed | 10 | 1 (10.00) | 0 (0.00) | 0 (0.00) | 40 | 7 (17.50) | 7 (17.50) | 2 (5.00) |
| **Marital Status** |  |  |  |  |  |  |  |  |
| Single | 33 | 5 (15.15) | 2 (6.06) | 1 (3.03) | 60 | 16 (26.67) | 9 (15.00) | 0 (0.00) |
| Married and living together | 119 | 25 (21.01) | 15 (12.61) | 1 (0.84) | 214 | 43 (20.09) | 25 (11.68) | 6 (2.80) |
| Separated/divorced/widowed | 6 | 2 (33.33) | 0 (0.00) | 0 (0.00) | 7 | 2 (28.57) | 0 (0.00) | 0 (0.00) |

Note: Percentages showed in the parentheses are the proportions of participants choosing each of the drinking reasons listed above in each subgroup, participants can choose multiple reasons.

a Feeling depressed and stressed.

b Required by superiors or elders.

c Regarding alcohol as the only drink.
